# Supplementary material for: Does Size Matter? The Case of Piezoresistive Properties of Carbon Nanotubes/Elastomer Nanocomposite Synthesized through Mechanochemistry
Source: MDPI journal article supplement (doi:10.3390/nano12213741), 2022-10-25
Supplement: s1 [file s1]

# Does size matter? The case of piezoresistive properties of carbon nanotubes/elastomer nanocomposite synthesized through mechanochemistry

Antonio Turco<sup>a\*</sup>, Anna Grazia Monteduro<sup>a,b</sup>, Francesco Montagna<sup>c</sup>, Elisabetta Primiceri<sup>a</sup>, Mariaenrica Frigione<sup>c</sup> and Giuseppe Maruccio<sup>a,b\*</sup>

<sup>a</sup> CNR Nanotec Institute of Nanotechnology, Via Monteroni, 73100 Lecce, Italy.

<sup>b</sup> Department of Mathematics and Physics “Ennio De Giorgi”, University of Salento, Omnis Research Group, Via per Monteroni, 73100 Lecce, Italy

<sup>c</sup> Department of Innovation Engineering, University of Salento, Prov.le Lecce-Monteroni, 73100 Lecce, Italy

*Corresponding author:* antonio.turco@nanotec.cnr.it; giuseppe.maruccio@unisalento.it

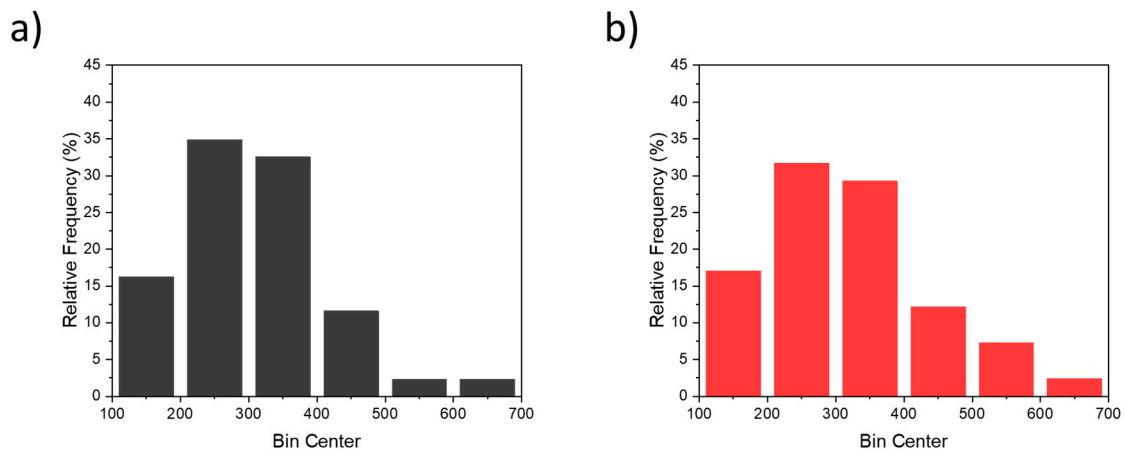

Figure S1. Pore size distribution of (a) PDMS/CNTs<sub>long</sub> and (b) PDMS/CNTs<sub>short</sub> foams.

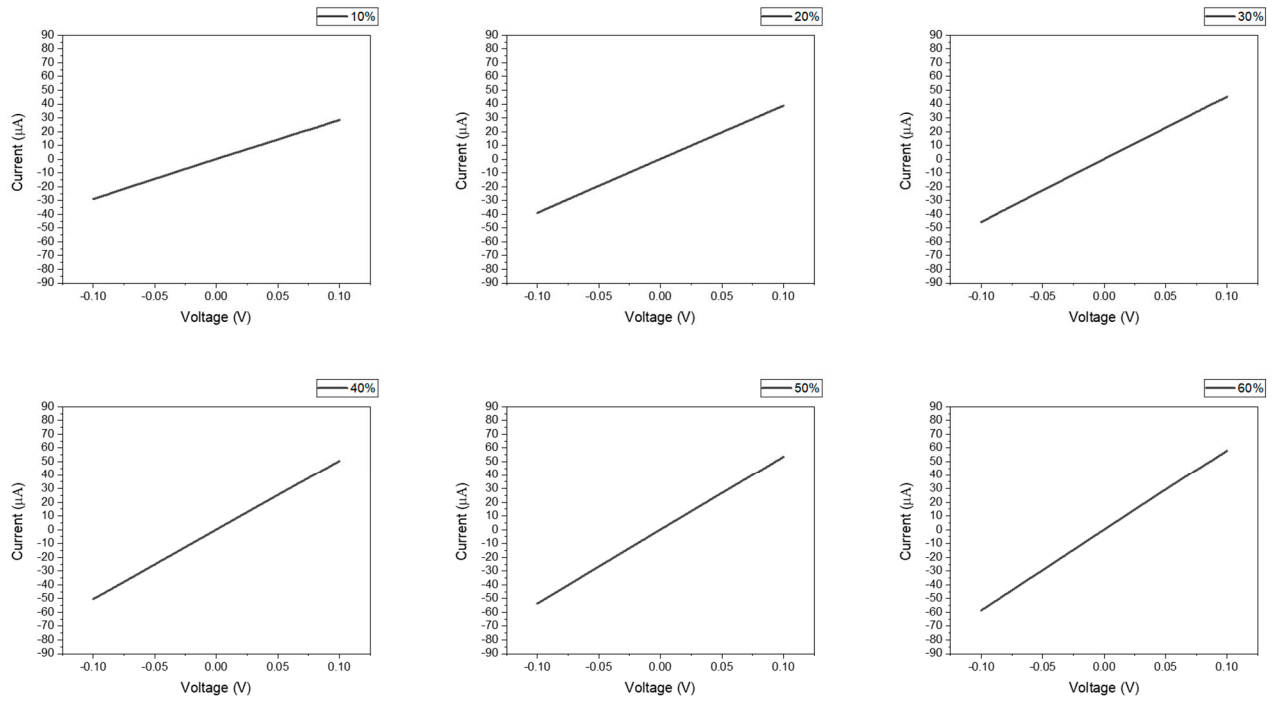

Figure S2. Current-voltage curves recorded at different strain levels from 10 to 60% on PDMS/CNTs<sub>long</sub>.

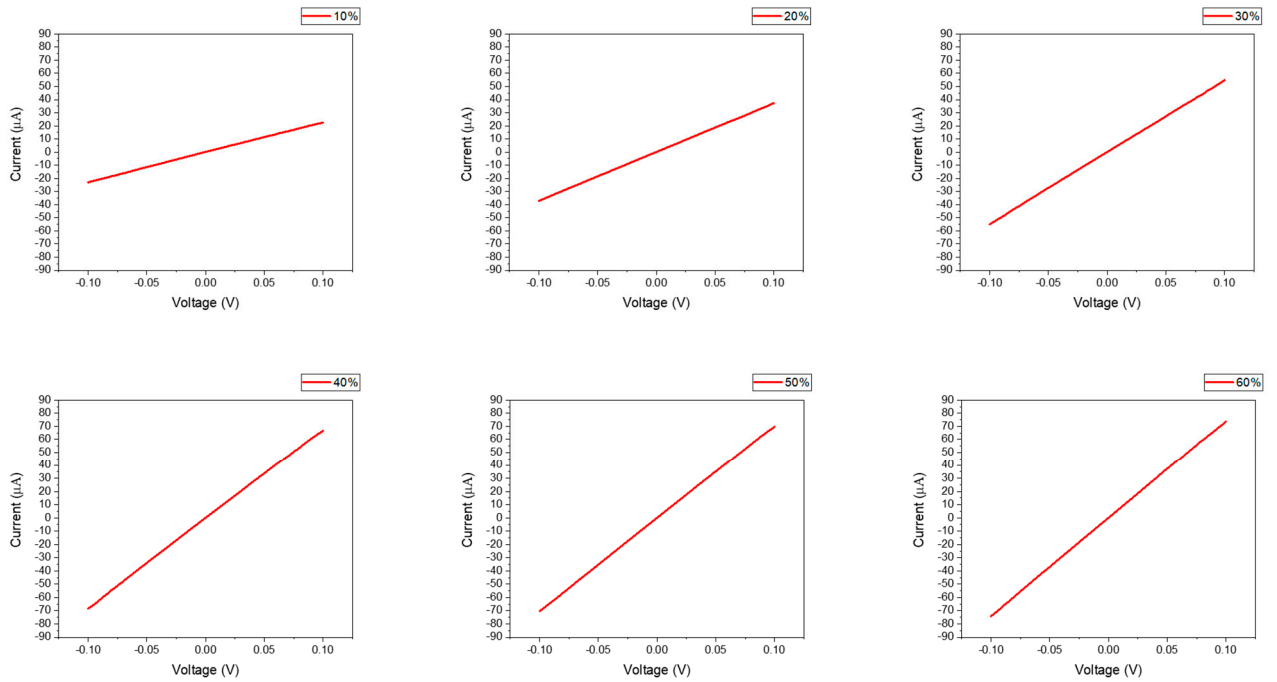

Figure S3. Current-voltage curves recorded at different strain levels from 10 to 60% on PDMS/CNTs<sub>short</sub>.

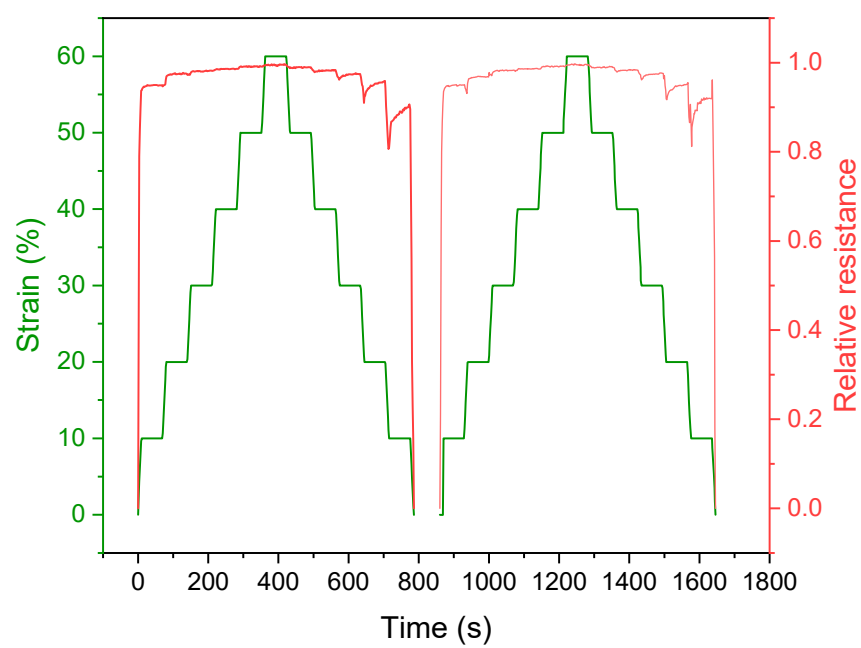

Figure S4. Two consecutive time-resolved current variation measured on PDMS/CNTs<sub>short</sub> (red curve) sponge subjected to loading/unloading steps from 0 to 60%.
